# Supplementary material for: Chlorhexidine gluconate 0.2% as a treatment for recalcitrant fungal keratitis in Uganda: a pilot study
Source: HighWire-hosted journal article supplement (doi:10.1136/bmjophth-2020-000698), 2021-07-01

**Supplemental Figure 1: Cornea appearance at presentation, on the day when topical chlorhexidine treatment was added and at the final review****Presentation – Day 1**

**Case 1:** Moderate conjunctival hyperaemia, central corneal defect, stromal abscess, hypopyon. Microbiology demonstrated *Aspergillus sp.* The patient was started on natamycin 5%

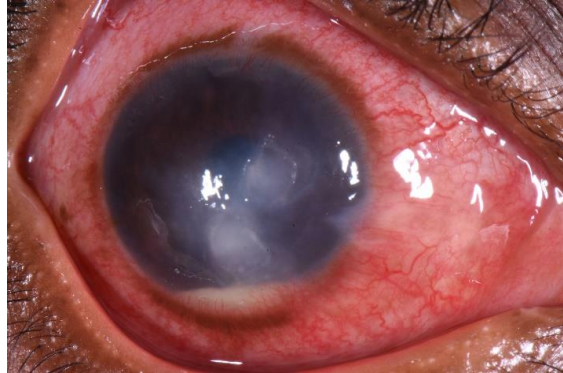**Re-evaluation and initiation of chlorhexidine**

Day 14: The infiltrate deepened and the patient developed a perforation. The patient was started on chlorhexidine 0.2% and continued natamycin 5%

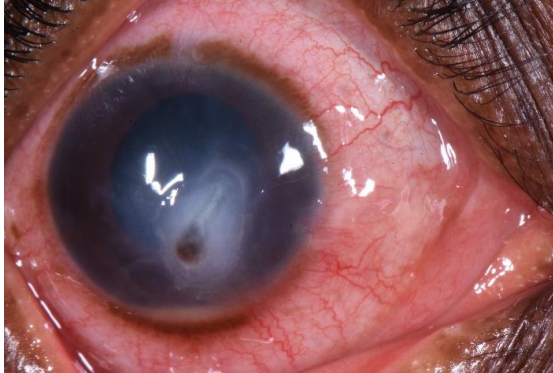**Final follow-up**

Year 1: healed cornea with scarring

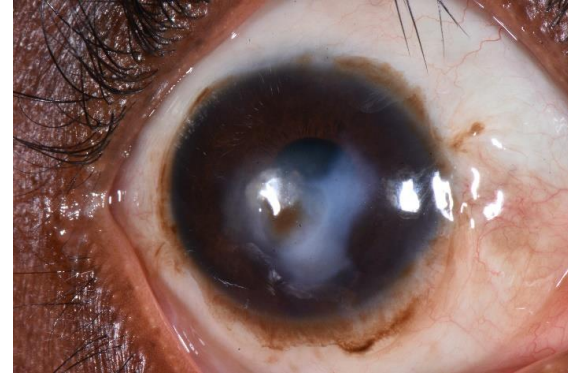

**Case 2:** Moderate conjunctival hyperaemia, paracentral oblique corneal defect, microbiology demonstrated *Aspergillus spp.* The patient was started on natamycin 5%

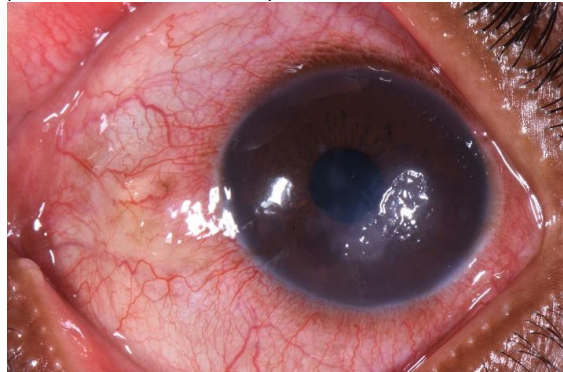

Day 7: Increasing corneal infiltrate and defect size. The patient was started on chlorhexidine 0.2% and continued natamycin 5%

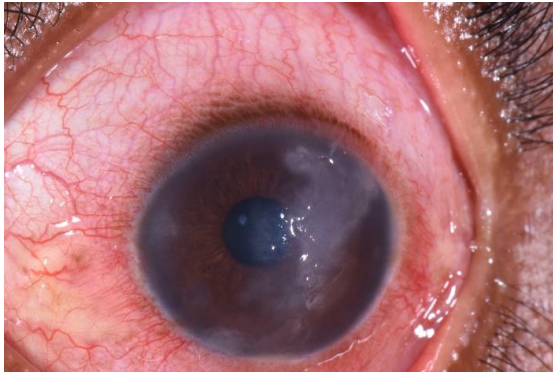

Day 45: Patient was lost to follow up

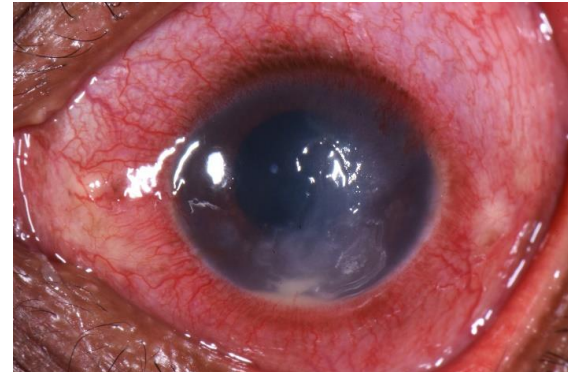

**Case 3:** Central corneal infiltrate with stromal abscess. Microscopy demonstrated fungal hyphae but there was no growth on culture. The patient was started on natamycin 5%

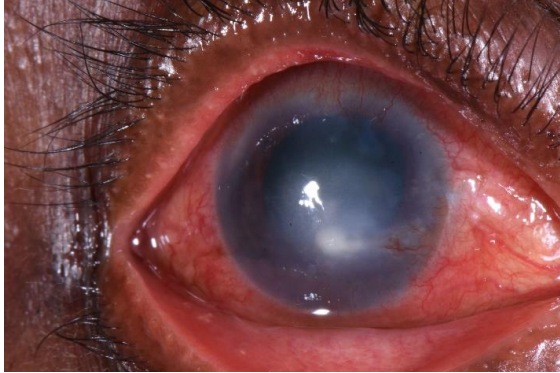

Day 14: Increasing inflammation, new epithelial defect and increasing corneal infiltrate. The patient was started on chlorhexidine 0.2% and continued natamycin 5%

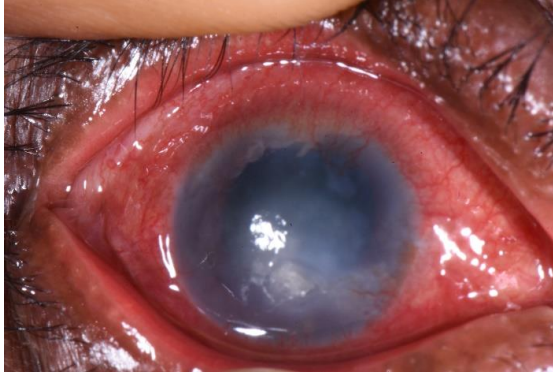

Year 1: healed cornea with scarring and vascularisation

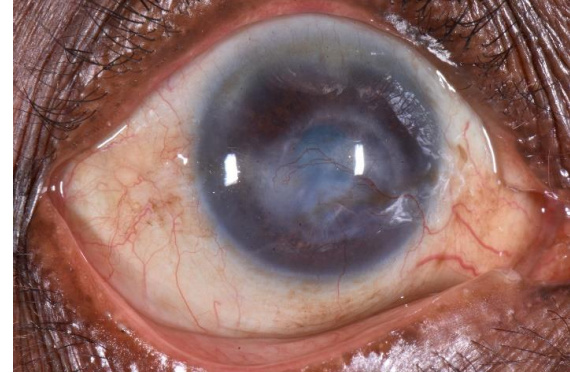

**Case 4:** Central infiltrate with corneal thinning, microbiology demonstrated *Fusarium sp.* The patient was started on natamycin 5%

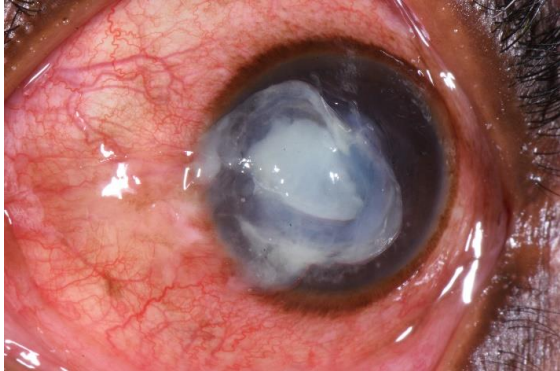

Day 2: Increased corneal melting with impending perforation. The patient was started on chlorhexidine 0.2% and continued natamycin 5%

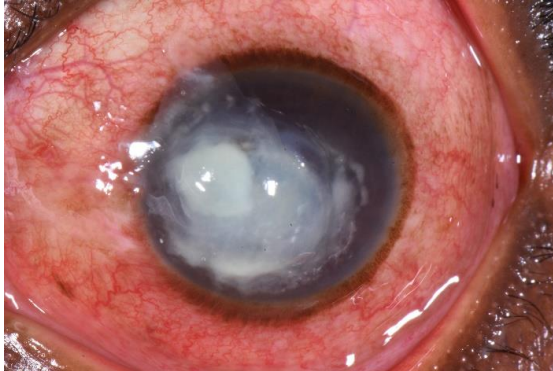

Day 14: total corneal melting necessitating evisceration (this patient had received a conjunctival flap on day 4).

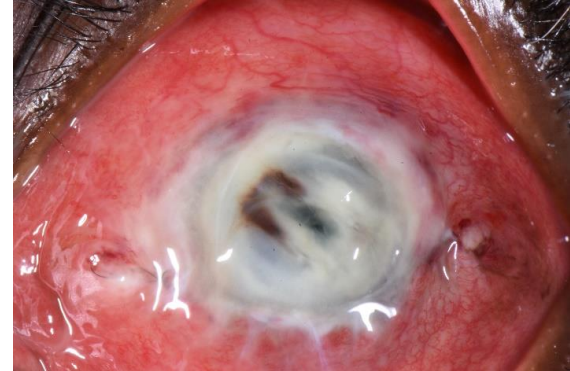



**Case 5:** A large epithelial defect with infiltrate. Microbiology demonstrated *Bipolaris* sp. The patient was started on natamycin 5%

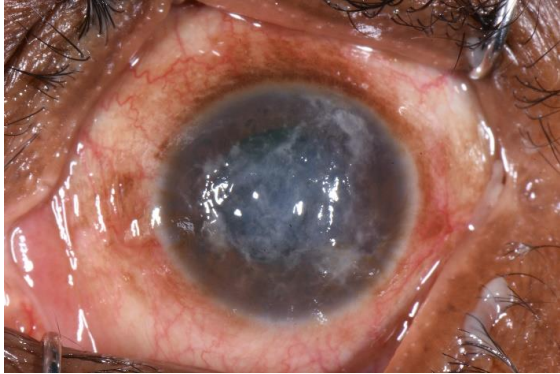

Day 7. This patient reported severe pain on applying natamycin 5%, it was discontinued and the patient started on chlorhexidine 0.2%

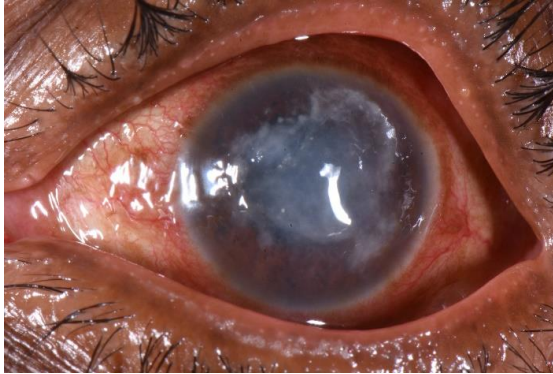

Year 1: healed cornea with scarring. The patient developed cataract

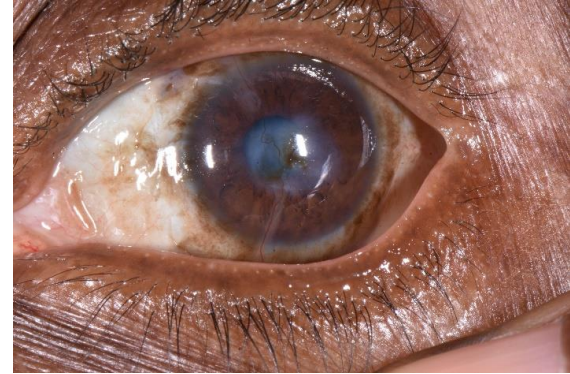

**Case 6:** Large paracentral stromal abscess with a bead like ring infiltrate and a hypopyon. Microscopy showed fungal hyphae; no growth on culture. The patient was started on natamycin 5%

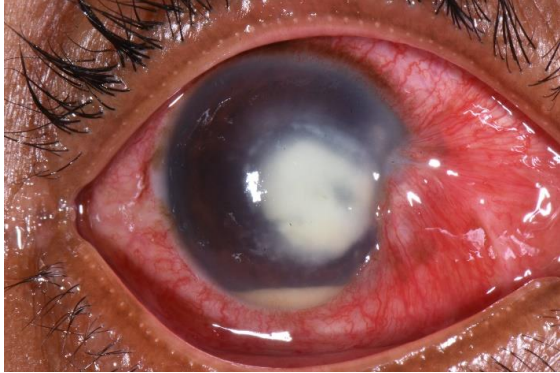

Day 14: Increasing infiltrate size, development of two large satellite infiltrates. The patient was started on chlorhexidine 0.2% and continued natamycin 5%

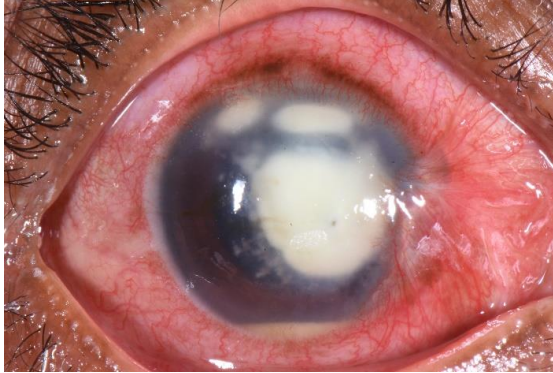

Year 1: Healed with a dense corneal scar and vascularisation.

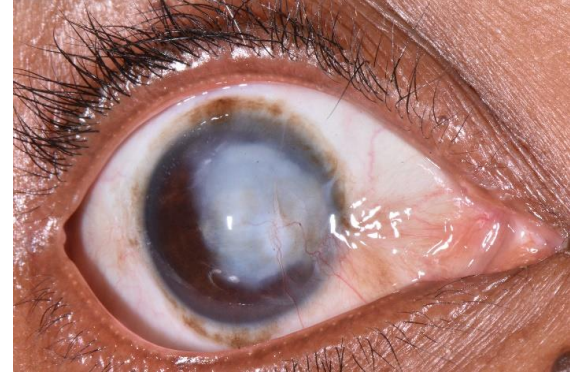



**Case 7:** Dense corneal infiltrate with impending perforation. Microscopy showed fungal hyphae; unidentified fungus on culture. The patient was started on natamycin 5%

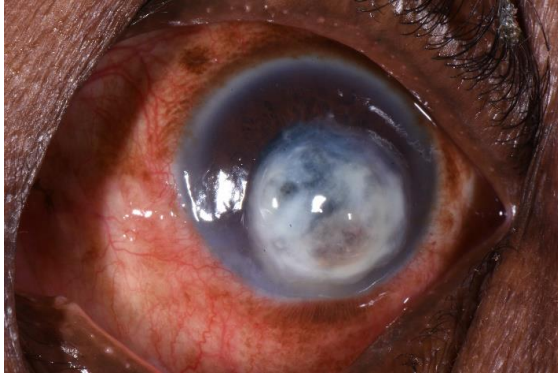

Day 3: Progressive corneal melting; total conjunctival flap performed. The patient was started on chlorhexidine 0.2% and continued natamycin 5%

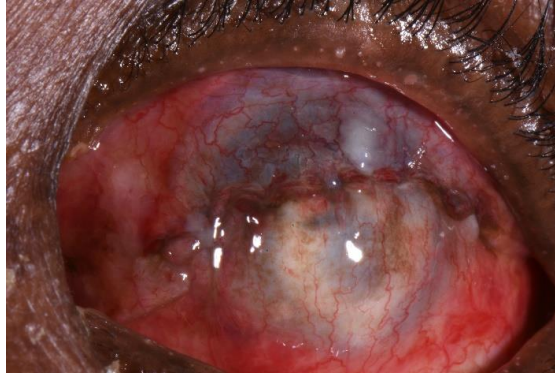

Year 1: Healed with a dense scar and corneal vascularisation.

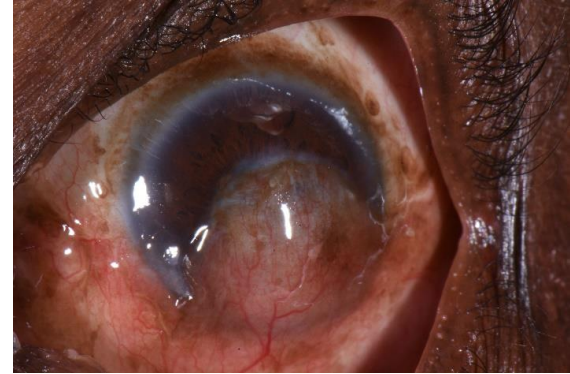

**Case 8.** Dense central corneal infiltrate with endothelial plaque and hypopyon. Microbiology confirmed *Fusarium sp.* The patient was started on natamycin 5%

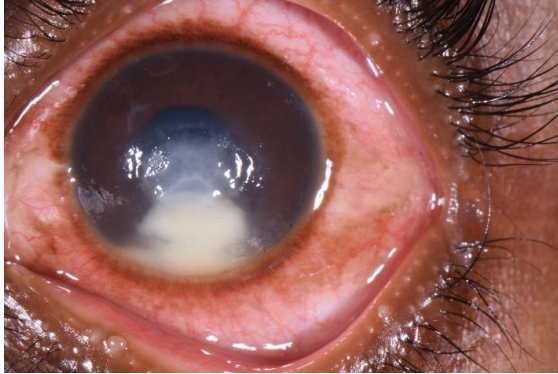

Day 21: Increasing infiltrate and endothelial plaque. The patient was started on chlorhexidine 0.2% and continued natamycin 5%

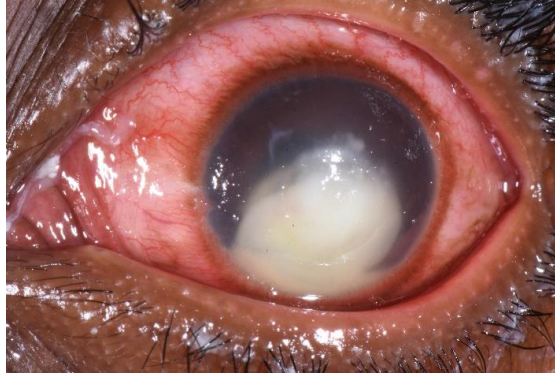

Year 1: Healed with a dense corneal scar

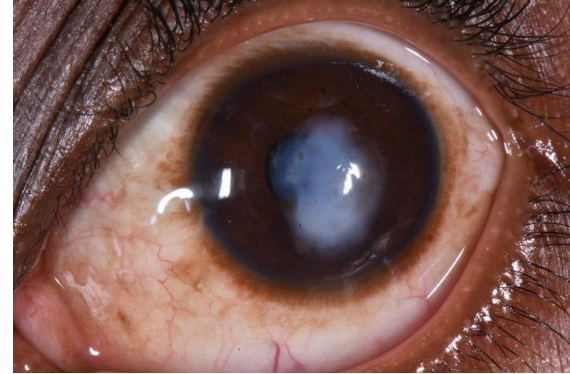

**Case 9** Corneal infiltrate and hypopyon. The eye had a pre-existing corneal scar. Microbiology confirmed *Candida sp.* The patient was started on natamycin 5%

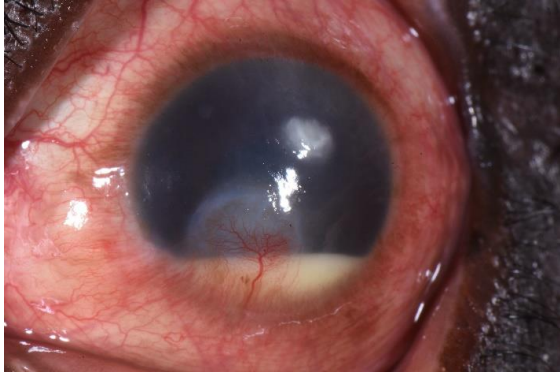

Day 3: Increasing corneal infiltrate and thinning. The patient was started on chlorhexidine 0.2% and continued natamycin 5%

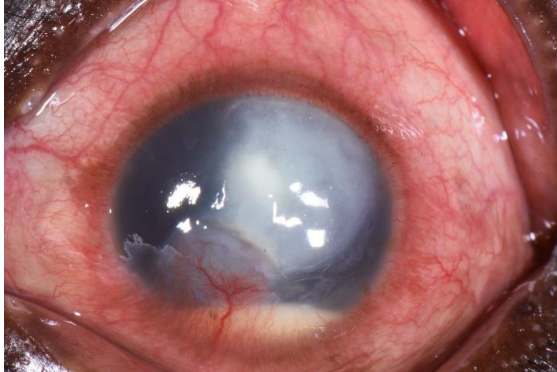

Day 14: Despite adding chlorhexidine and a total conjunctival flap a few days later, there was total melting which required evisceration.

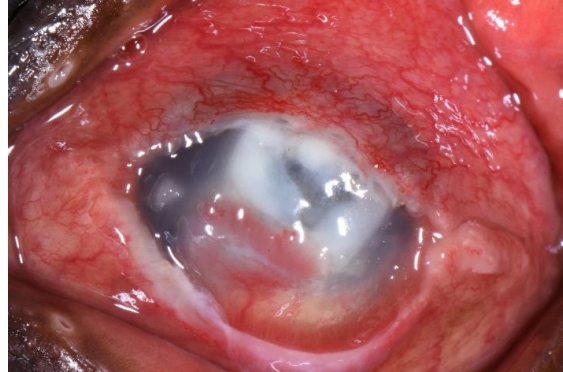

**Case 10.** Corneal infiltrate involving the whole cornea with a hypopyon. Microbiology demonstrated *Acremonium sp.* The patient was started on natamycin 5%

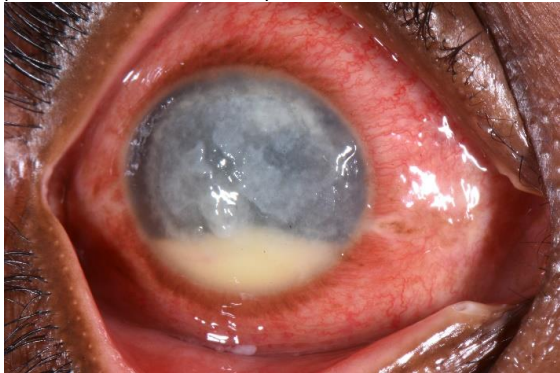

Day 7. Very slow response and notable new endothelial plaques and deepening ulceration. The patient was started on chlorhexidine 0.2% and continued natamycin 5%

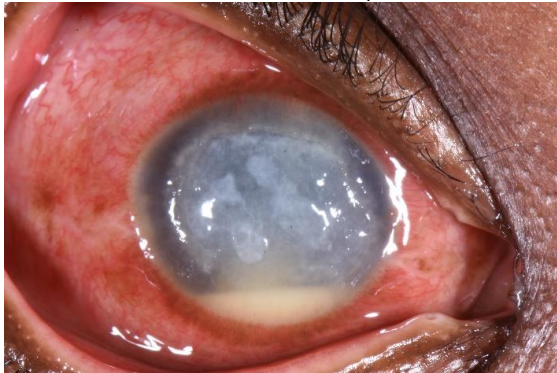

Day 90: Healed with a dense corneal scar and corneal vascularisation

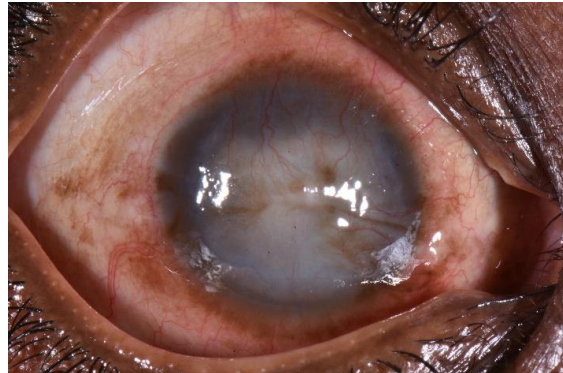



**Case 11:** Central corneal ring infiltrate and a hypopyon. Microbiology demonstrated *Lasilodiplodia theobromae*. The patient was started on natamycin 5%

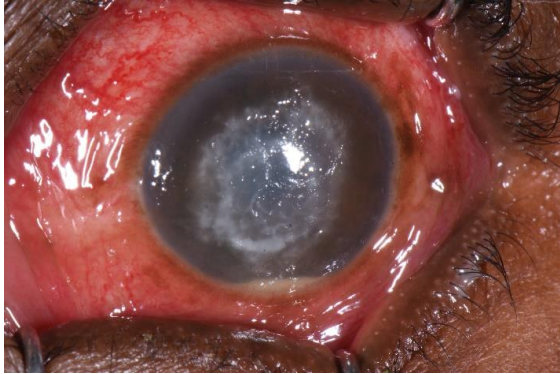

Day 7: Increased corneal infiltrate. The patient was started on chlorhexidine 0.2% and continued natamycin 5%

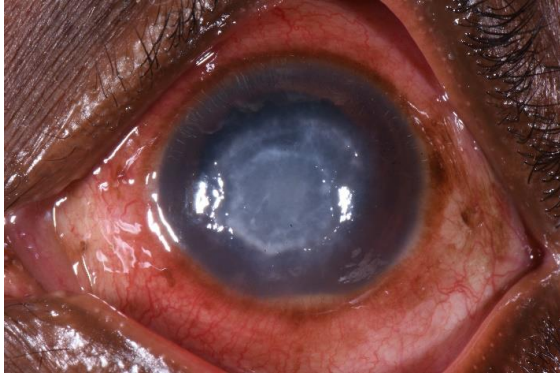

Day 90: Healed with moderate stromal scarring

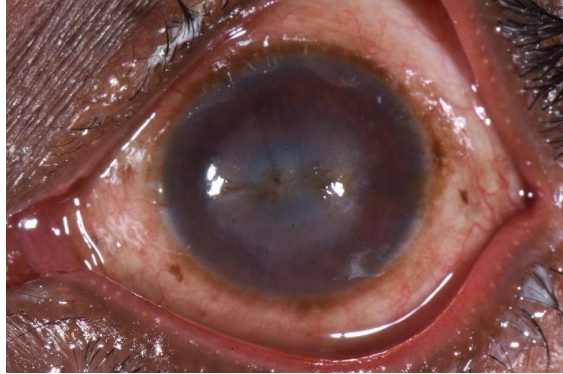

**Case 12:** Large corneal infiltrate with hypopyon. Microbiology demonstrated *Bipolaris* sp. The patient was started on natamycin 5%

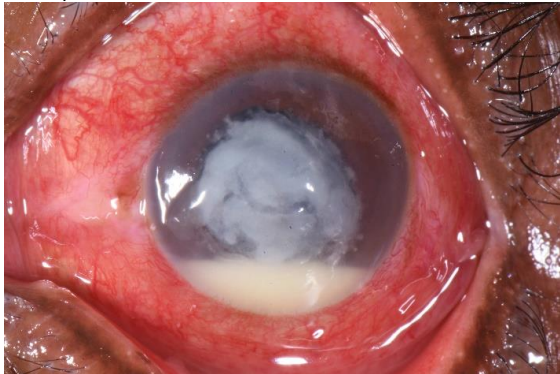

Day 14: Increasing corneal infiltrate with development of new satellite lesions. The patient was started on chlorhexidine 0.2% and continued natamycin 5%

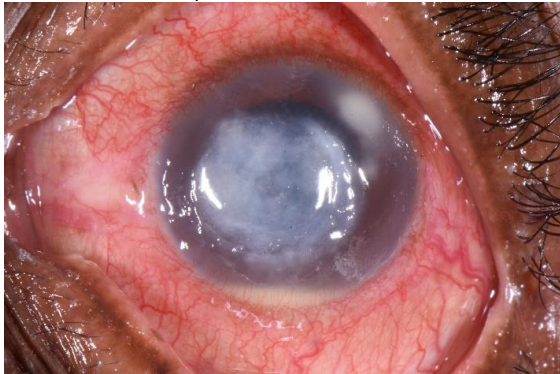

Year 1: Healed with a dense corneal scar. (This patient also received a total conjunctival flap due to the slowly healing ulcer)

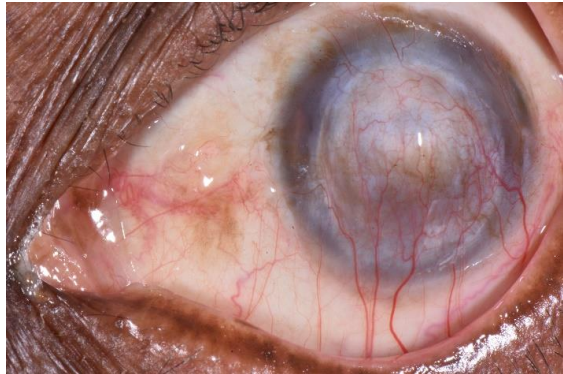

**Case 13:** Central epithelial defect with a dense endothelial plaque and a hypopyon. Microbiology demonstrated *Fusarium* sp. The patient was started on natamycin 5%

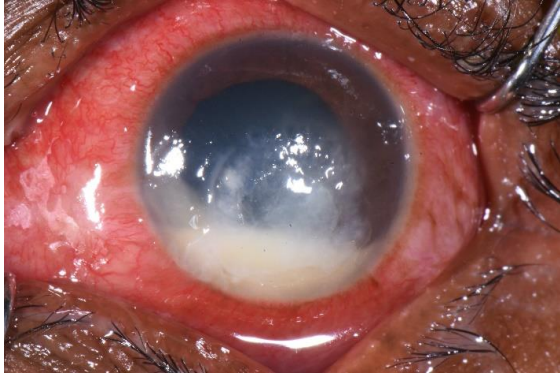

Day 21: Increasing infiltrate, development of new satellite lesions and increasing hypopyon. The patient was started on chlorhexidine 0.2% and continued natamycin 5%

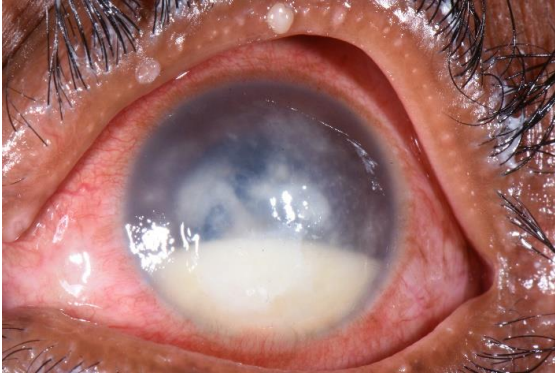

Day 90: Patient developed total corneal melting and perforation. The eye had to be eviscerated.

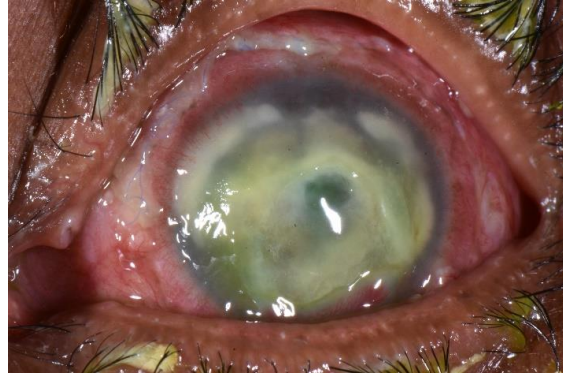

Supplement: bmjophth-2020-000698supp001_data_supplement.pdf [file bmjophth-2020-000698supp001_data_supplement.pdf]
